# Supplementary material
Source: Springer Nature journal article supplement (https://www.springermedizin.de/resource/supplementary/12877_2013_885_MOESM2_ESM.pdf/9440618)
Supplement: MOESM2 [file 9440618]

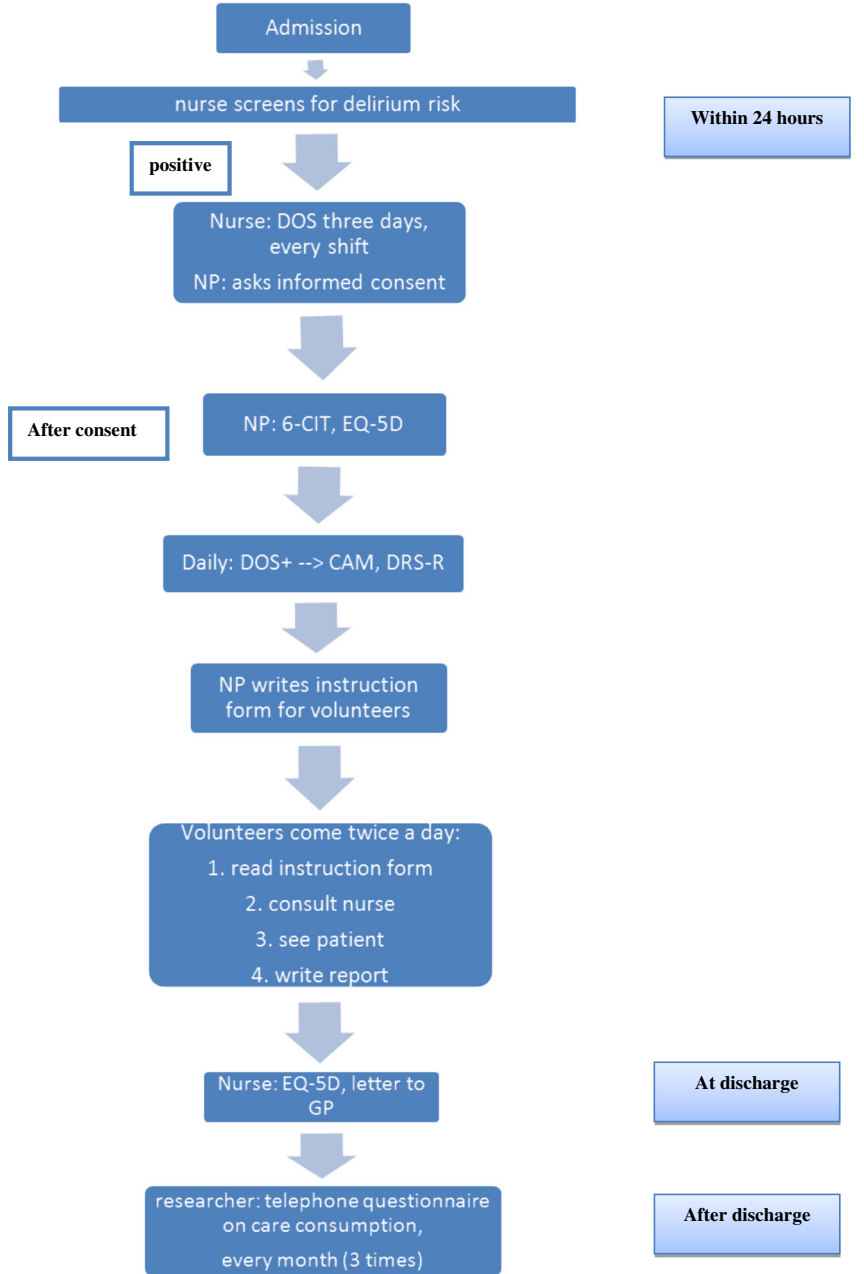

NP = Nurse Practitioner  
 DOS = Delirium Observation Scale  
 CAM = Confusion Assessment Method  
 DRS = Delirium Rating Scale – revised – 98

EQ-5D = questionnaire on health related quality of life  
 6-CIT = Six Item Cognitive Impairment Test  
 GP = general practitioner
